# Supplementary material for: Platinum–hydrogen vibrations and low energy electronic excitations of 13-atom Pt nanoclusters
Source: Royal Society of Chemistry journal article supplement (doi:10.1039/c4cp02052a), 2014-08-28
Supplement: c4cp02052a1.pdf [file c4cp02052a1.pdf]

## Supporting electronic information:

# Platinum-hydrogen vibrations and low energy electronic excitations of 13-atom Pt nanoclusters

Melanie Keppeler<sup>†</sup> and Emil Roduner<sup>†‡\*</sup>

<sup>†</sup> Institut für Physikalische Chemie, Universität Stuttgart,  
Pfaffenwaldring 55, D-70569 Stuttgart, Germany

<sup>‡</sup> Department of Chemistry, University of Pretoria, Pretoria 0002, Republic of South Africa

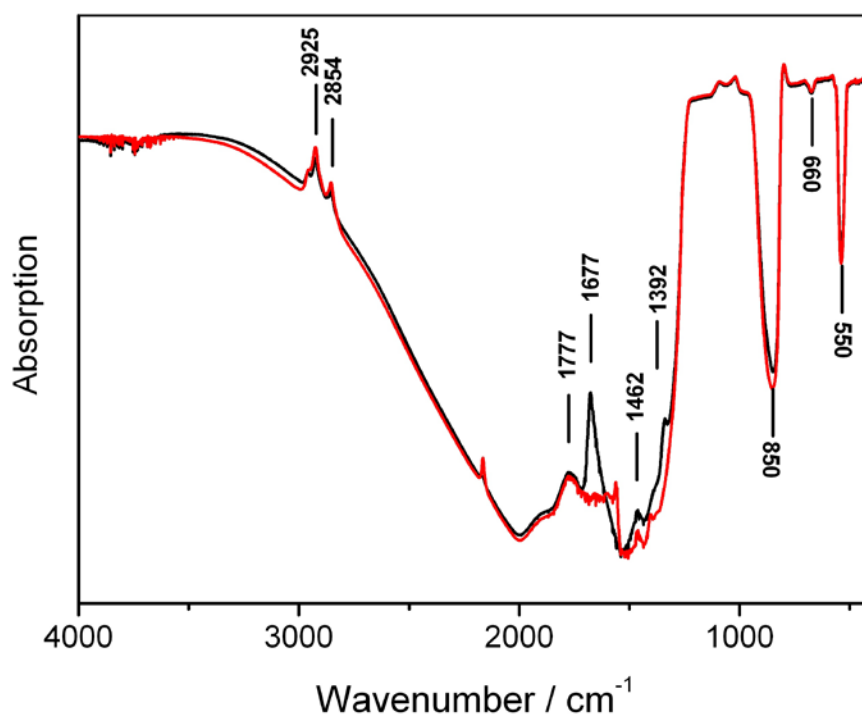

**Figure S1:** Raw spectra of the Pt/KL sample after initial hydrogen ( $\text{H}_2$ ) reduction (black) and after hydrogen desorption at 573 K (red), measured as difference against the empty cell. Such spectra are taken as the background which is subtracted by the instrument software from all spectra of the subsequent series of measurements. It is seen that the zeolite blocks IR radiation below ca.  $1380\text{ cm}^{-1}$  except at two narrow windows at 850 and  $550\text{ cm}^{-1}$ . The noise-like features near  $3700\text{ cm}^{-1}$  belong to water vapour in the beam (likely outside the cell) and the bands at 2925 and  $2854\text{ cm}^{-1}$  are C–H stretching vibrations of organic condensates, perhaps on the cell window.

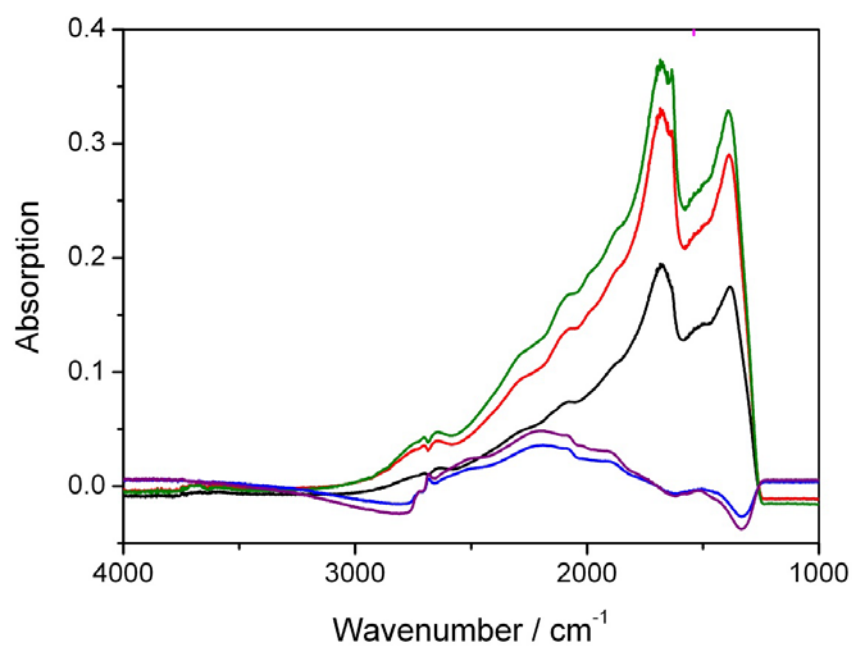

**Figure S2:** Extended range of IR difference spectra shown in Figure 1 to illustrate the absence of significant absorption due to the Pt clusters above ca. 3100 cm<sup>-1</sup> (From top to bottom: H<sub>2</sub> 200 mbar (green), H<sub>2</sub> 40 mbar (red), H<sub>2</sub> 0.5 mbar (black), D<sub>2</sub> 40 mbar (purple), D<sub>2</sub> 1 mbar (blue)).
